1 **Comparison of the predictive values of diagnostic tests subject to a**  
2 **case-control sampling with application to the diagnosis of Human**  
3 **African Trypanosomiasis**

4 José Antonio Roldán-Nofuentes<sup>1\*</sup>, Saad Bouh Sidaty-Regad<sup>2</sup>

5 <sup>1</sup>Department of Statistics, School of Medicine, University of Granada, Spain

6 <sup>2</sup>Department of Public Health and Epidemiology, School of Medicine, University of  
7 Nouakchott, Mauritania

8 \*Corresponding author

9 Email: jaroldan@ugr.es

10

11 **Abstract.** Case-control sampling to compare the accuracy of two binary diagnostic tests is  
12 frequent in clinical practice. This type of sampling consists of applying the two diagnostic  
13 tests to all of the individuals in a sample of those who have the disease and in another sample  
14 of those who do not have the disease. In this sampling, the sensitivities are compared from the  
15 case sample applying the McNemar's test, and the specificities from the control sample. Other  
16 parameters of binary tests are the positive and negative predictive values. The predictive  
17 values of a diagnostic test represent the clinical accuracy of a binary diagnostic test when it is  
18 applied to the individuals in a population with a determined disease prevalence. This article  
19 studies the comparison of the predictive values of two diagnostic tests subject to a case-  
20 control sampling. A global hypothesis test, based on the chi-square distribution, is proposed to  
21 compare the predictive values simultaneously. The comparison of the predictive values is also  
22 studied individually. The hypothesis tests studied require knowledge of the disease  
23 prevalence. Simulation experiments were carried out to study the type I errors and the powers  
24 of the hypothesis tests proposed, as well as to study the effect of a misspecification of the

25 prevalence on the asymptotic behavior of the hypothesis tests and on the estimators of the  
26 predictive values. The results obtained were applied to a real example on the diagnosis of the  
27 Human African Trypanosomiasis. The model proposed was extended to the situation in which  
28 there are more than two diagnostic tests.

29 **Keywords:** Case-control sampling, Diagnostic test, Human African Trypanosomiasis,  
30 Predictive values.

31

## 32 **1. Introduction**

33 The main parameters to assess and compare the accuracy of binary diagnostic tests (BDTs)  
34 are sensitivity and specificity. The sensitivity (Se) is the probability of the result of the BDT  
35 being positive when the individual has the disease and the specificity (Sp) is the probability of  
36 the result of the BDT being negative when the individual does not have the disease. Other  
37 parameters that are used to assess and compare two BDTs are the predictive values (PVs).  
38 The positive predictive value (PPV) is the probability of an individual having the disease  
39 when the result of the BDT is positive, and the negative predictive value (NPV) is the  
40 probability of an individual not having the disease when the result of the BDT is negative.  
41 The PVs represent the accuracy of the diagnostic test when it is applied to a cohort of  
42 individuals, and they are measures of the clinical accuracy of the BDT. The PVs depend on  
43 the Se and the Sp of the BDT and on the disease prevalence ( $p$ ), and are easily calculated  
44 applying Bayes' Theorem i.e.

$$45 \quad PPV = \frac{p \times Se}{p \times Se + (1 - p) \times (1 - Sp)} \quad \text{and} \quad NPV = \frac{(1 - p) \times Sp}{p \times (1 - Se) + (1 - p) \times Sp}. \quad (1)$$

46 Whereas the Se and the Sp quantify how well the BDT reflects the true disease status (present  
47 or absent), the PVs quantify the clinical value of the BDT, since both the individual and the

48 clinician are more interested in knowing how probable it is to have the disease given a BDT  
49 result.

50 The comparison of the performance of two binary diagnostic tests is a topic of special  
51 importance in the study of statistical methods for the diagnosis of diseases. This comparison  
52 can be made through a cross-sectional sampling or a case-control sampling. Cross-sectional  
53 sampling consists of applying the two BDTs and the gold standard to all of the individuals in  
54 a single sample. Case-control sampling consists of applying the two BDTs to all of the  
55 individuals in two samples, one made up of individuals who have the disease (case sample)  
56 and another made up of individuals who do not have the disease (control sample). The  
57 advantages and disadvantages of case-control sampling over the cross-sectional can be seen in  
58 the book by Pepe (2003). Summarizing, case-control sampling has some advantages over  
59 cross-sectional: a) case-control design is more efficient in terms of sample size requirements,  
60 b) case-control studies allow for the exploration of subject-related characteristics of the test.  
61 Nevertheless, the case-control design has the disadvantage is that by using it we cannot  
62 estimate the prevalence of the disease.

63 The comparison of the sensitivities and the specificities of two BDTs subject to cross-  
64 sectional sampling or subject to case-control sampling is made applying the exact comparison  
65 test of two paired binomial proportions or McNemar's test (the asymptotic version of the  
66 exact test).

67 In cross-sectional sampling, the comparison of PVs has been the subject of several studies.  
68 Bennett (1972, 1985), Leisenring et al (2000), Wang et al (2006) and Kosinski (2013) studied  
69 hypothesis tests to independently compare the PPVs and the NPVs of two BDTs. Moskowitz  
70 and Pepe (2006) studied the estimation of the PVs through a confidence region. Roldán-  
71 Nofuentes et al (2012) studied the joint comparison of the PPVs and NPVs of two BDTs, and

72 proposed a global hypothesis test based on the chi-square distribution to simultaneously  
73 compare the PVs of two BDTs.

74 In a case-control sampling, Mercaldo et al (2007) have studied the estimation of the PVs of  
75 a BDT, assuming that the disease prevalence is known. In this article, we extended the study  
76 of Mercaldo et al to the case of two BDTs, studying the comparison of the PVs of the two  
77 BDTs subject to a case-control sampling. Subject to a case-control sampling, the two BDTs  
78 are applied to all of the individual in two samples, one of  $n_1$  individuals who have the disease  
79 (case sample) and another with  $n_2$  individuals who do not have the disease (control sample).

80 In this sampling, the sample sizes  $n_1$  and  $n_0$  are set by the researcher. The sample of  
81 individuals that have the disease is extracted from a population of individuals that have the  
82 disease (e.g. registers of diseases), and the control sample is extracted from a population of  
83 individuals who are known not to have the disease. As the PVs depend on the disease  
84 prevalence and subject to a case-control sampling the quotient  $n_1/(n_1 + n_2)$  is not an estimator  
85 of the prevalence, in order to estimate and compare the PVs subject to this sampling it is  
86 necessary to know the prevalence or an estimate of the prevalence. This estimation can be  
87 obtained from health surveys or from previous studies. Consequently, the methods of  
88 comparison of the PVs subject to a cross-sectional sampling cannot be applied when there is a  
89 case-control sampling. In Section 2, we study hypothesis tests to jointly and individually  
90 compare the PVs of two BDTs subject to case-control sampling. In Section 3, simulation  
91 experiments are carried out to study the type I errors and the powers of the hypothesis tests  
92 proposed in Section 2. In Section 4, we study the effect of the misspecification of the  
93 prevalence on the asymptotic behavior of the hypothesis tests proposed in Section 2 and on  
94 the estimators of the PVs. In Section 5, the results are applied to a real example of the  
95 diagnosis of Human African Trypanosomiasis. In Section 6, the model proposed in Section 2

96 was extended to the situation in which we compare the PVs of more than two BDTs, and in  
 97 Section 7 the results are discussed.

98

## 99 2. The model

100 Let us consider two BDTs, Test 1 and Test 2, which are applied to all of the individuals in  
 101 two samples, one of  $n_1$  individuals who have the disease (case sample) and another of  $n_2$   
 102 individuals who do not have it (control sample). Let  $T_1$  and  $T_2$  be two binary variables that  
 103 model the results of each BDT, in such a way that  $T_i = 1$  when the result of the corresponding  
 104 BDT is positive and  $T_i = 0$  when it is negative. In Table 1, we can see the probabilities  
 105 associated to the application of both BDTs to both types of individuals (cases and controls), as  
 106 well as the frequencies observed.

107

108 Table 1. Probabilities and observed frequencies subject to case-control sampling.

| Probabilities        |              |              |              |           |               |               |              |
|----------------------|--------------|--------------|--------------|-----------|---------------|---------------|--------------|
| Case                 |              |              |              | Control   |               |               |              |
|                      | $T_2 = 1$    | $T_2 = 0$    | Total        |           | $T_2 = 1$     | $T_2 = 0$     | Total        |
| $T_1 = 1$            | $\xi_{111}$  | $\xi_{110}$  | $Se_1$       | $T_1 = 1$ | $\xi_{211}$   | $\xi_{210}$   | $1 - Sp_1$   |
| $T_1 = 0$            | $\xi_{101}$  | $\xi_{100}$  | $1 - Se_1$   | $T_1 = 0$ | $\xi_{201}$   | $\xi_{200}$   | $Sp_1$       |
| Total                | $Se_2$       | $1 - Se_2$   | 1            | Total     | $1 - Sp_2$    | $Sp_2$        | 1            |
| Observed frequencies |              |              |              |           |               |               |              |
| Case                 |              |              |              | Control   |               |               |              |
|                      | $T_2 = 1$    | $T_2 = 0$    | Total        |           | $T_2 = 1$     | $T_2 = 0$     | Total        |
| $T_1 = 1$            | $n_{111}$    | $n_{110}$    | $n_{1\Box}$  | $T_1 = 1$ | $n_{211}$     | $n_{210}$     | $n_{2\Box}$  |
| $T_1 = 0$            | $n_{101}$    | $n_{100}$    | $n_{10\Box}$ | $T_1 = 0$ | $n_{201}$     | $n_{200}$     | $n_{20\Box}$ |
| Total                | $n_{\Box 1}$ | $n_{\Box 0}$ | $n_1$        | Total     | $n_{2\Box 1}$ | $n_{2\Box 0}$ | $n_2$        |

109

110 Using the conditional dependence model of Vacek (1985), the probabilities given in the table  
 111 are written as

$$112 \xi_{1jk} = Se_1^j (1 - Se_1)^{1-j} Se_2^k (1 - Se_2)^{1-k} + \delta_{jk} \epsilon^+ \quad (2)$$

113 and

$$114 \quad \xi_{2,jk} = Sp_1^{1-j} (1 - Sp_1)^j Sp_2^{1-k} (1 - Sp_2)^k + \delta_{jk} \varepsilon^-, \quad (3)$$

115 with  $j, k = 0, 1$ . The parameter  $\varepsilon^+$  ( $\varepsilon^-$ ) is the covariance between the two BDTs in cases  
 116 (controls), where  $\delta_{jk} = 1$  if  $j = k$  and  $\delta_{jk} = -1$  if  $j \neq k$ , and it is verified that  
 117  $0 \leq \varepsilon^+ \leq \text{Min}\{Se_1(1 - Se_2), Se_2(1 - Se_1)\}$  and  $0 \leq \varepsilon^- \leq \text{Min}\{Sp_1(1 - Sp_2), Sp_2(1 - Sp_1)\}$ . If  
 118  $\varepsilon^+ = \varepsilon^- = 0$  then the two BDTs are conditionally independent on the disease status. In  
 119 practice, the assumption of the conditional independence is not realistic, and therefore  $\varepsilon^+ > 0$   
 120 and/or  $\varepsilon^- > 0$ . In terms of the probabilities  $\xi_{ijk}$ , the sensitivities are written as

$$121 \quad Se_1 = \xi_{111} + \xi_{110} \quad \text{and} \quad Se_2 = \xi_{111} + \xi_{101},$$

122 and the specificities as

$$123 \quad Sp_1 = \xi_{201} + \xi_{200} \quad \text{and} \quad Sp_2 = \xi_{210} + \xi_{200}.$$

124 From the case (control) samples  $Se_1$  and  $Se_2$  ( $Sp_1$  and  $Sp_2$ ) are estimated i.e.

$$125 \quad \hat{Se}_1 = \frac{n_{11\Box}}{n_1} \quad \text{and} \quad \hat{Se}_2 = \frac{n_{1\Box 1}}{n_1},$$

126 and

$$127 \quad \hat{Sp}_1 = \frac{n_{20\Box}}{n_2} \quad \text{and} \quad \hat{Sp}_2 = \frac{n_{2\Box 0}}{n_2},$$

128 and the estimators of their variances are  $\hat{Var}(\hat{Se}_1) = \hat{Se}_1(1 - \hat{Se}_1)/n_1$ ,

129  $\hat{Var}(\hat{Se}_2) = \hat{Se}_2(1 - \hat{Se}_2)/n_1$ ,  $\hat{Var}(\hat{Sp}_1) = \hat{Sp}_1(1 - \hat{Sp}_1)/n_2$  and  $\hat{Var}(\hat{Sp}_2) = \hat{Sp}_2(1 - \hat{Sp}_2)/n_2$ .

130 Therefore, the sensitivities and the specificities are estimated as proportions of marginal  
 131 totals. In this way, in the case sample we are interested in the marginal frequencies  $n_{11\Box}$  and  
 132  $n_{1\Box 1}$ , and therefore these frequencies are the product of a type I bivariate binomial distribution  
 133 (Kocherlakota and Kocherlakota, 1992). In an analogous way, from the control sample, the

134 marginal frequencies  $n_{20\Box}$  and  $n_{2\Box0}$  are the product of a type I bivariate binomial distribution.  
 135 In the individuals with the disease, the type I bivariate binomial distribution is characterized  
 136 (Kocherlakota and Kocherlakota, 1992) by the two probabilities  $Se_1$  and  $Se_2$  and by the  
 137 correlation coefficient ( $\rho^+$ ) between  $T_1$  and  $T_2$ . In an analogous way, in the individuals who  
 138 do not have the disease, the type I bivariate binomial distribution is characterized by  $Sp_1$ ,  $Sp_2$   
 139 and the correlation coefficient ( $\rho^-$ ) between  $T_1$  and  $T_2$ . In the individuals with the disease  
 140 (cases), the correlation coefficient between the two BDTs is

$$141 \quad \rho^+ = \frac{\xi_{111} - Se_1 Se_2}{\sqrt{Se_1(1-Se_1)Se_2(1-Se_2)}} = \frac{\varepsilon^+}{\sqrt{Se_1(1-Se_1)Se_2(1-Se_2)}}, \quad (4)$$

142 and in the individuals who do not have the disease (controls), the correlation coefficient  
 143 between the two BDTs is

$$144 \quad \rho^- = \frac{\xi_{200} - Sp_1 Sp_2}{\sqrt{Sp_1(1-Sp_1)Sp_2(1-Sp_2)}} = \frac{\varepsilon^-}{\sqrt{Sp_1(1-Sp_1)Sp_2(1-Sp_2)}}. \quad (5)$$

145 It is easy to check that

$$146 \quad \hat{\varepsilon}^+ = \frac{n_1 n_{111} - n_{1\Box} n_{\Box1}}{n_1^2} \quad \text{and} \quad \hat{\varepsilon}^- = \frac{n_2 n_{200} - n_{2\Box} n_{\Box0}}{n_2^2},$$

$$147 \quad \hat{Cov}(\hat{Se}_1, \hat{Se}_2) = (\hat{\xi}_{111} - \hat{Se}_1 \hat{Se}_2) / n_1 = \hat{\varepsilon}^+ / n_1$$

148 and

$$149 \quad \hat{Cov}(\hat{Sp}_1, \hat{Sp}_2) = (\hat{\xi}_{200} - \hat{Sp}_1 \hat{Sp}_2) / n_2 = \hat{\varepsilon}^- / n_2.$$

150 All of the other covariances are zero, since the two samples are independent. The estimators  
 151 of  $\rho^+$  and  $\rho^-$  are

$$152 \quad \hat{\rho}^+ = \frac{n_1 n_{111} - n_{1\Box} n_{\Box1}}{\sqrt{n_{1\Box}(n_1 - n_{1\Box})n_{\Box1}(n_1 - n_{\Box1})}} \quad \text{and} \quad \hat{\rho}^- = \frac{n_2 n_{200} - n_{2\Box} n_{\Box0}}{\sqrt{n_{2\Box}(n_2 - n_{2\Box})n_{\Box0}(n_2 - n_{\Box0})}}.$$

153 Assuming that prevalence  $p$  (or an estimation) is known, the estimators of the predictive  
 154 values are

$$155 \quad \hat{PPV}_1 = \frac{pn_2n_{1\Box}}{pn_2n_{1\Box} + qn_1(n_2 - n_{20\Box})} \quad \text{and} \quad \hat{NPV}_1 = \frac{qn_1n_{20\Box}}{pn_2(n_1 - n_{1\Box}) + qn_1n_{20\Box}} \quad (6)$$

156 for Test 1, and

$$157 \quad \hat{PPV}_2 = \frac{pn_2n_{1\Box}}{pn_2n_{1\Box} + qn_1(n_2 - n_{20\Box})} \quad \text{and} \quad \hat{NPV}_2 = \frac{qn_1n_{20\Box}}{pn_2(n_1 - n_{1\Box}) + qn_1n_{20\Box}} \quad (7)$$

158 for Test 2, where  $q = 1 - p$ . Let the variance-covariance matrixes be defined as

$$159 \quad \Sigma_{\hat{se}} = \begin{pmatrix} Var(\hat{Se}_1) & Cov(\hat{Se}_1, \hat{Se}_2) \\ Cov(\hat{Se}_1, \hat{Se}_2) & Var(\hat{Se}_2) \end{pmatrix} \quad (8)$$

160 and

$$161 \quad \Sigma_{\hat{sp}} = \begin{pmatrix} Var(\hat{Sp}_1) & Cov(\hat{Sp}_1, \hat{Sp}_2) \\ Cov(\hat{Sp}_1, \hat{Sp}_2) & Var(\hat{Sp}_2) \end{pmatrix}. \quad (9)$$

162 Let  $\boldsymbol{\theta} = (Se_1, Se_2, Sp_1, Sp_2)^T$  be a vector whose components are the sensitivities and the  
 163 specificities, and let  $\boldsymbol{\omega} = (PPV_1, PPV_2, NPV_1, NPV_2)^T$  be a vector whose components are the  
 164 predictive values. The variance-covariance matrix of  $\hat{\boldsymbol{\theta}}$  is

$$165 \quad \Sigma_{\hat{\boldsymbol{\theta}}} = \begin{pmatrix} 1 & 0 \\ 0 & 0 \end{pmatrix} \otimes \Sigma_{\hat{se}} + \begin{pmatrix} 0 & 0 \\ 0 & 1 \end{pmatrix} \otimes \Sigma_{\hat{sp}}, \quad (10)$$

166 where  $\otimes$  is the product of Kronecker. Applying the delta method, the matrix of variances-  
 167 covariances of  $\hat{\boldsymbol{\omega}}$  is

$$168 \quad \Sigma_{\hat{\boldsymbol{\omega}}} = \left( \frac{\partial \boldsymbol{\omega}}{\partial \boldsymbol{\theta}} \right) \Sigma_{\hat{\boldsymbol{\theta}}} \left( \frac{\partial \boldsymbol{\omega}}{\partial \boldsymbol{\theta}} \right)^T. \quad (11)$$

169 In Appendix A, we can see the expressions of the variances-covariances of the PVs. Then, we  
 170 study the joint comparison and the individual comparison of the PVs of the two BDTs. In



171 both cases, and as has been explained in Section 1, it is assumed that there is an estimation of  
 172 the disease prevalence based on a health survey or other studies.

173

174 *2.1. Global hypothesis test*

175 The PVs of each BDT depend on the same parameters, the sensitivity and the specificity of  
 176 the test and disease prevalence, and therefore they are parameters that depend on each other.

177 Consequently, the PVs of the two BDTs can be compared simultaneously. The global  
 178 hypothesis test to simultaneously compare the PVs of the two BDTs is

$$179 \begin{aligned} H_0 : PPV_1 = PPV_2 \quad \text{and} \quad NPV_1 = NPV_2 \\ H_1 : \text{at least one equality is not true,} \end{aligned}$$

180 which is equivalent to the hypothesis test

$$181 H_0 : \mathbf{A}\boldsymbol{\omega} = \mathbf{0} \quad \text{vs} \quad H_1 : \mathbf{A}\boldsymbol{\omega} \neq \mathbf{0}, \quad (12)$$

182 where  $\mathbf{A}$  is a complete range design matrix and a dimension  $2 \times 4$ , i.e.

$$183 \mathbf{A} = \begin{pmatrix} 1 & 0 \\ 0 & 1 \end{pmatrix} \otimes (1 \quad -1).$$

184 As the vector  $\hat{\boldsymbol{\omega}}$  is distributed asymptotically according to a multivariate normal distribution,

185 i.e.  $\sqrt{n_1 + n_2} (\hat{\boldsymbol{\omega}} - \boldsymbol{\omega}) \xrightarrow{n_1 + n_2 \rightarrow \infty} N(\mathbf{0}, \boldsymbol{\Sigma}_{\boldsymbol{\omega}})$ , then the statistic for the global hypothesis test (12)

186 is

$$187 Q^2 = \hat{\boldsymbol{\omega}}^T \mathbf{A}^T \left( \mathbf{A} \hat{\boldsymbol{\Sigma}}_{\hat{\boldsymbol{\omega}}} \mathbf{A}^T \right)^{-1} \mathbf{A} \hat{\boldsymbol{\omega}}, \quad (13)$$

188 which is distributed asymptotically according to Hotelling's  $T$ -squared distribution with a

189 dimension 2 and  $n_1 + n_2$  degrees of freedom, where 2 is the dimension of the vector  $\mathbf{A}\hat{\boldsymbol{\omega}}$ .

190 When  $n_1 + n_2$  is large, the statistic  $Q^2$  is distributed according to a central chi-square

191 distribution with 2 degrees of freedom when the null hypothesis is true.

192

## 193 2.2. Individual hypothesis tests

194 The hypothesis test to individually compare the two PPVs (NPVs) is

$$195 H_0 : PV_1 = PV_2 \text{ vs } H_0 : PV_1 \neq PV_2,$$

196 where PV is PPV or NPV. Based on the asymptotic normality of the estimators, the statistic  
197 for this hypothesis test is

$$198 z = \frac{|\hat{P}V_1 - \hat{P}V_2|}{\sqrt{\hat{V}ar(\hat{P}V_1) + \hat{V}ar(\hat{P}V_2) - 2\hat{C}ov(\hat{P}V_1, \hat{P}V_2)}}, \quad (14)$$

199 which is distributed asymptotically according to a normal standard distribution, and where the  
200 variances-covariances is obtained from the equation (11).

201

## 202 2.3. Alternative methods to the global test

203 The global hypothesis test (12) simultaneously compares the PPVs and the NPVs of the two  
204 BDTs. Some alternative methods to this global hypothesis test, based on the individual  
205 hypothesis tests, are: 1) Testing the hypotheses  $H_0 : PPV_1 = PPV_2$  and  $H_0 : NPV_1 = NPV_2$ ,  
206 each one to an error  $\alpha$ ; 2) Testing the hypotheses  $H_0 : PPV_1 = PPV_2$  and  $H_0 : NPV_1 = NPV_2$ ,  
207 and applying a multiple comparison method such as Bonferroni's method (1936) or Holm's  
208 method (1979), which are methods that are very easy to apply based on the p-values.  
209 Bonferroni's method consists of solving each individual hypothesis test to an error  $\alpha/2$ ; and  
210 Holm's method is a step-down method which is based on Bonferroni's method but is more  
211 conservative. In Appendix B, Holm's method is summarized.

212

## 213 3. Simulation experiments

214 Simulation experiments were carried out to study the type I errors and the powers of the four  
215 methods proposed to solve the global hypothesis test: the hypothesis test based on the chi-

216 square (equation (13)), the individual hypothesis tests each one to an error  $\alpha$ , and the  
217 individual hypothesis tests applying Bonferroni's method and Holm's method. We have also  
218 studied the effect of a misspecification of the prevalence on the asymptotic behaviour of the  
219 global hypothesis test and on the estimators of the PVs.

220 The experiments were designed setting the values of the PVs. For each BDT, we took as  
221 PVs the values  $\{0.70, 0.75, \dots, 0.90, 0.95\}$ , and as disease prevalence we took the values 10%,  
222 25% and 50%. Based on the PVs and the prevalence, the Se and the Sp of each BDT were  
223 calculated from the equations (1) and (2), only considering those cases in which the solutions  
224 are between 0 and 1. As values of the correlation coefficients  $\rho^+$  and  $\rho^-$  we took low values  
225 (25% of the maximum value), intermediate ones (50% of the maximum value) and high ones  
226 (75% of the maximum value), and the maximum value of each correlation coefficient is:

$$227 \max(\rho^+) = \frac{\min\{Se_1(1-Se_2), (1-Se_1)Se_2\}}{\sqrt{Se_1(1-Se_1)Se_2(1-Se_2)}} \quad \text{and} \quad \max(\rho^-) = \frac{\min\{Sp_1(1-Sp_2), (1-Sp_1)Sp_2\}}{\sqrt{Sp_1(1-Sp_1)Sp_2(1-Sp_2)}}.$$

228 As sample sizes, we took the values  $n_i = \{50, 75, 100, 200, 500\}$ . The simulation experiments  
229 were carried out with R, using the bindata package to generate the samples of each type I  
230 bivariate binomial distribution.

231 Regarding the random samples, these were generated in the following way. Firstly, once  
232 the values of the PVs and of the prevalence were set, we calculated the sensitivities and the  
233 specificities and maximum values of the coefficients  $\rho^+$  and  $\rho^-$ . We then generated 10,000  
234 samples with a type I bivariate binomial distribution with a sample size  $n_1$ , probabilities  $Se_1$   
235 and  $Se_2$  and correlation coefficient  $\rho^+$ , and another 10,000 samples with a type I bivariate  
236 binomial distribution with a sample size  $n_0$ , probabilities  $Sp_1$  and  $Sp_2$  and correlation  
237 coefficient  $\rho^-$ . In this way, we obtained the marginal frequencies  $n_{1\Box}$  and  $n_{\Box 1}$  ( $n_{20\Box}$  and  $n_{\Box 20}$ )  
238 of each one of the 10, 000 case (control) samples. The rest of the marginal frequencies were

239 easily calculated:  $n_{10\bar{0}} = n_1 - n_{11\bar{0}}$ ,  $n_{1\bar{0}0} = n_1 - n_{1\bar{1}0}$ ,  $n_{2\bar{0}0} = n_2 - n_{20\bar{0}}$  and  $n_{2\bar{0}\bar{0}} = n_2 - n_{2\bar{2}0}$ . Then and in  
240 order to construct the  $2 \times 2$  table of each case simple, we generated a random valor  $n_{111}$  of a  
241 doubly truncated binomial distribution of parameters  $n_1$  and  $\xi_{111} = Se_1 Se_2 + \varepsilon^+$  with  
242  $n_{11\bar{0}} + n_{1\bar{1}0} - n_1 \leq n_{111} \leq \text{Min}\{n_{11\bar{0}}, n_{1\bar{1}0}\}$ . This is necessary so that the sum of the frequencies leads  
243 to the marginal totals randomly generated through the type I bivariate binomial distribution.  
244 In the same way, in order to construct the  $2 \times 2$  table of each control sample, we generated a  
245 random value  $n_{200}$  of a doubly truncated binomial distribution of parameters  $n_2$  and  
246  $\xi_{200} = Sp_1 Sp_2 + \varepsilon^-$  with  $n_{20\bar{0}} + n_{2\bar{2}0} - n_2 \leq n_{200} \leq \text{Min}\{n_{20\bar{0}}, n_{2\bar{2}0}\}$ . For each one of the 10,000 case  
247 (control) samples, once we have generated the values  $n_{11\bar{0}}$ ,  $n_{1\bar{1}0}$  and  $n_{111}$  ( $n_{20\bar{0}}$ ,  $n_{2\bar{2}0}$  and  $n_{200}$ )  
248 it is easy to construct the complete  $2 \times 2$  table. Thus,  $n_{110} = n_1 - n_{11\bar{0}}$ ,  $n_{101} = n_{1\bar{1}0} - n_{111}$  and  
249  $n_{100} = n_{10\bar{0}} - n_{101}$  for the case samples, and  $n_{201} = n_{20\bar{0}} - n_{200}$ ,  $n_{210} = n_{2\bar{2}0} - n_{200}$  and  
250  $n_{211} = n_{21\bar{0}} - n_{210}$ . For the experiments, the error  $\alpha = 5\%$  was set. Moreover, all of the samples  
251 were generated in such a way that in all of them the parameters and the variances-covariances  
252 can be estimated.

253

### 254 3.1. Type I errors and powers

255 In Tables 2 and 3, we can see some results obtained for the type I errors of the global test and  
256 of the alternative methods proposed in Section 2.3. In these tables, we can only see the results  
257 for the global test, the individual comparisons with  $\alpha = 5\%$  and with Bonferroni's method.  
258 The results obtained with Holm's method are not shown as they are practically the same as  
259 those obtained with Bonferroni's method. From the results obtained we can draw the  
260 following conclusions. In general terms, the type I error of the global hypothesis test  
261 fluctuates around the error  $\alpha = 5\%$ , especially in the case of samples sized  $n_i \geq 100$ ,

262 depending on the prevalence and the correlations between the two BDTs. For samples with  
263 smaller sizes ( $n_i \leq 75$ ), the type I error of the global test is lower than the error  $\alpha = 5\%$ . The  
264 correlations between the two BDTs have an important effect on the type I error of the global  
265 test, with a decrease in the type I error when there is an increase in the correlation  
266 coefficients. Regarding the method based on the individual hypothesis tests  $H_0 : PPV_1 = PPV_2$   
267 and  $H_0 : NPV_1 = NPV_2$  to an error  $\alpha = 5\%$  each one of them, the type I error may clearly  
268 overwhelm the nominal error (a situation that we have considered when the type I error is  
269 greater than 6.5%), especially when the correlations are not high. Consequently, this method  
270 may lead to erroneous results (false significances) and, therefore, should not be used. As for  
271 solving the global test from the individual tests applying Bonferroni's (Holm's) method, the  
272 type I error has a very similar behaviour to that of the global hypothesis test.

273

274

275

276

277

278

279

280

281

282

283

284

285

286

287

Table 2. Type I errors for  $PPV_1 = PPV_2 = 0.70$  and  $NPV_1 = NPV_2 = 0.95$ .

| $Se_1 = 0.5385, Sp_1 = 0.9744, Se_2 = 0.5385, Sp_2 = 0.9744$ |       |                                     |                |       |                                     |                |       |                                     |                |       |
|--------------------------------------------------------------|-------|-------------------------------------|----------------|-------|-------------------------------------|----------------|-------|-------------------------------------|----------------|-------|
| $0 \leq \rho^+ \leq 1, 0 \leq \rho^- \leq 1$                 |       |                                     |                |       |                                     |                |       |                                     |                |       |
| $p = 10\%$                                                   |       |                                     |                |       |                                     |                |       |                                     |                |       |
|                                                              |       | $\rho^+ = 0.25 \quad \rho^- = 0.25$ |                |       | $\rho^+ = 0.50 \quad \rho^- = 0.50$ |                |       | $\rho^+ = 0.75 \quad \rho^- = 0.75$ |                |       |
| $n_1$                                                        | $n_2$ | Global                              | $\alpha = 5\%$ | Bonf. | Global                              | $\alpha = 5\%$ | Bonf. | Global                              | $\alpha = 5\%$ | Bonf. |
| 50                                                           | 50    | 0.031                               | 0.051          | 0.029 | 0.027                               | 0.048          | 0.027 | 0.004                               | 0.013          | 0.004 |
| 50                                                           | 75    | 0.029                               | 0.059          | 0.029 | 0.025                               | 0.051          | 0.026 | 0.004                               | 0.017          | 0.005 |
| 50                                                           | 100   | 0.028                               | 0.063          | 0.030 | 0.029                               | 0.061          | 0.028 | 0.008                               | 0.018          | 0.007 |
| 75                                                           | 75    | 0.023                               | 0.061          | 0.026 | 0.031                               | 0.056          | 0.028 | 0.015                               | 0.034          | 0.017 |
| 100                                                          | 100   | 0.027                               | 0.063          | 0.029 | 0.023                               | 0.052          | 0.024 | 0.020                               | 0.043          | 0.019 |
| 200                                                          | 200   | 0.044                               | 0.086          | 0.045 | 0.032                               | 0.063          | 0.031 | 0.025                               | 0.050          | 0.026 |
| 500                                                          | 500   | 0.055                               | 0.107          | 0.056 | 0.058                               | 0.102          | 0.057 | 0.040                               | 0.077          | 0.039 |
| $Se_1 = 0.8615, Sp_1 = 0.8769, Se_2 = 0.8615, Sp_2 = 0.8769$ |       |                                     |                |       |                                     |                |       |                                     |                |       |
| $0 \leq \rho^+ \leq 1, 0 \leq \rho^- \leq 1$                 |       |                                     |                |       |                                     |                |       |                                     |                |       |
| $p = 25\%$                                                   |       |                                     |                |       |                                     |                |       |                                     |                |       |
|                                                              |       | $\rho^+ = 0.25 \quad \rho^- = 0.25$ |                |       | $\rho^+ = 0.50 \quad \rho^- = 0.50$ |                |       | $\rho^+ = 0.75 \quad \rho^- = 0.75$ |                |       |
| $n_1$                                                        | $n_2$ | Global                              | $\alpha = 5\%$ | Bonf. | Global                              | $\alpha = 5\%$ | Bonf. | Global                              | $\alpha = 5\%$ | Bonf. |
| 50                                                           | 50    | 0.048                               | 0.094          | 0.046 | 0.018                               | 0.047          | 0.018 | 0.001                               | 0.007          | 0.002 |
| 50                                                           | 75    | 0.053                               | 0.100          | 0.051 | 0.025                               | 0.063          | 0.026 | 0.002                               | 0.012          | 0.003 |
| 50                                                           | 100   | 0.053                               | 0.106          | 0.057 | 0.034                               | 0.076          | 0.032 | 0.008                               | 0.023          | 0.008 |
| 75                                                           | 75    | 0.059                               | 0.105          | 0.055 | 0.039                               | 0.087          | 0.037 | 0.007                               | 0.016          | 0.006 |
| 100                                                          | 100   | 0.059                               | 0.117          | 0.059 | 0.056                               | 0.102          | 0.054 | 0.011                               | 0.040          | 0.010 |
| 200                                                          | 200   | 0.058                               | 0.099          | 0.057 | 0.048                               | 0.094          | 0.049 | 0.044                               | 0.090          | 0.042 |
| 500                                                          | 500   | 0.052                               | 0.098          | 0.053 | 0.051                               | 0.101          | 0.052 | 0.049                               | 0.090          | 0.048 |
| $Se_1 = 0.9692, Sp_1 = 0.5846, Se_2 = 0.9692, Sp_2 = 0.5846$ |       |                                     |                |       |                                     |                |       |                                     |                |       |
| $0 \leq \rho^+ \leq 1, 0 \leq \rho^- \leq 1$                 |       |                                     |                |       |                                     |                |       |                                     |                |       |
| $p = 50\%$                                                   |       |                                     |                |       |                                     |                |       |                                     |                |       |
|                                                              |       | $\rho^+ = 0.25 \quad \rho^- = 0.25$ |                |       | $\rho^+ = 0.50 \quad \rho^- = 0.50$ |                |       | $\rho^+ = 0.75 \quad \rho^- = 0.75$ |                |       |
| $n_1$                                                        | $n_2$ | Global                              | $\alpha = 5\%$ | Bonf. | Global                              | $\alpha = 5\%$ | Bonf. | Global                              | $\alpha = 5\%$ | Bonf. |
| 50                                                           | 50    | 0.026                               | 0.049          | 0.026 | 0.025                               | 0.061          | 0.026 | 0.006                               | 0.017          | 0.006 |
| 50                                                           | 75    | 0.020                               | 0.049          | 0.023 | 0.019                               | 0.052          | 0.024 | 0.007                               | 0.028          | 0.010 |
| 50                                                           | 100   | 0.019                               | 0.043          | 0.023 | 0.016                               | 0.045          | 0.019 | 0.010                               | 0.034          | 0.014 |
| 75                                                           | 75    | 0.024                               | 0.065          | 0.027 | 0.020                               | 0.051          | 0.027 | 0.012                               | 0.038          | 0.017 |
| 100                                                          | 100   | 0.028                               | 0.066          | 0.029 | 0.021                               | 0.052          | 0.025 | 0.012                               | 0.042          | 0.019 |
| 200                                                          | 200   | 0.047                               | 0.088          | 0.044 | 0.034                               | 0.074          | 0.032 | 0.021                               | 0.058          | 0.026 |
| 500                                                          | 500   | 0.052                               | 0.099          | 0.052 | 0.050                               | 0.097          | 0.049 | 0.037                               | 0.077          | 0.034 |

288 Global: Global hypothesis test based on the chi-square distribution.

289  $\alpha = 5\%$  : Individual hypothesis tests each one to an error  $\alpha = 5\%$  .

290 Bonf.: Bonferroni's method.

291

292

293

294

295

Table 3. Type I errors for  $PPV_1 = PPV_2 = 0.85$  and  $NPV_1 = NPV_2 = 0.95$ .

| $Se_1 = 0.5312, Sp_1 = 0.9896, Se_2 = 0.5312, Sp_2 = 0.9896$ |       |                                     |                |       |                                     |                |       |                                     |                |       |
|--------------------------------------------------------------|-------|-------------------------------------|----------------|-------|-------------------------------------|----------------|-------|-------------------------------------|----------------|-------|
| $0 \leq \rho^+ \leq 1, 0 \leq \rho^- \leq 1$                 |       |                                     |                |       |                                     |                |       |                                     |                |       |
| $p = 10\%$                                                   |       |                                     |                |       |                                     |                |       |                                     |                |       |
|                                                              |       | $\rho^+ = 0.25 \quad \rho^- = 0.25$ |                |       | $\rho^+ = 0.50 \quad \rho^- = 0.50$ |                |       | $\rho^+ = 0.75 \quad \rho^- = 0.75$ |                |       |
| $n_1$                                                        | $n_2$ | Global                              | $\alpha = 5\%$ | Bonf. | Global                              | $\alpha = 5\%$ | Bonf. | Global                              | $\alpha = 5\%$ | Bonf. |
| 50                                                           | 50    | 0.033                               | 0.056          | 0.034 | 0.020                               | 0.051          | 0.024 | 0.004                               | 0.014          | 0.004 |
| 50                                                           | 75    | 0.024                               | 0.049          | 0.024 | 0.026                               | 0.050          | 0.025 | 0.005                               | 0.019          | 0.006 |
| 50                                                           | 100   | 0.032                               | 0.057          | 0.033 | 0.030                               | 0.056          | 0.030 | 0.004                               | 0.016          | 0.004 |
| 75                                                           | 75    | 0.034                               | 0.054          | 0.033 | 0.025                               | 0.052          | 0.026 | 0.014                               | 0.036          | 0.015 |
| 100                                                          | 100   | 0.027                               | 0.055          | 0.026 | 0.027                               | 0.055          | 0.026 | 0.017                               | 0.041          | 0.017 |
| 200                                                          | 200   | 0.033                               | 0.059          | 0.031 | 0.025                               | 0.050          | 0.024 | 0.022                               | 0.055          | 0.021 |
| 500                                                          | 500   | 0.046                               | 0.087          | 0.049 | 0.031                               | 0.068          | 0.033 | 0.018                               | 0.050          | 0.024 |
| $Se_1 = 0.85, Sp_1 = 0.95, Se_2 = 0.85, Sp_2 = 0.95$         |       |                                     |                |       |                                     |                |       |                                     |                |       |
| $0 \leq \rho^+ \leq 1, 0 \leq \rho^- \leq 1$                 |       |                                     |                |       |                                     |                |       |                                     |                |       |
| $p = 25\%$                                                   |       |                                     |                |       |                                     |                |       |                                     |                |       |
|                                                              |       | $\rho^+ = 0.25 \quad \rho^- = 0.25$ |                |       | $\rho^+ = 0.50 \quad \rho^- = 0.50$ |                |       | $\rho^+ = 0.75 \quad \rho^- = 0.75$ |                |       |
| $n_1$                                                        | $n_2$ | Global                              | $\alpha = 5\%$ | Bonf. | Global                              | $\alpha = 5\%$ | Bonf. | Global                              | $\alpha = 5\%$ | Bonf. |
| 50                                                           | 50    | 0.023                               | 0.058          | 0.022 | 0.005                               | 0.030          | 0.007 | 0.001                               | 0.005          | 0.001 |
| 50                                                           | 75    | 0.037                               | 0.077          | 0.036 | 0.014                               | 0.039          | 0.015 | 0.001                               | 0.008          | 0.001 |
| 50                                                           | 100   | 0.049                               | 0.092          | 0.048 | 0.022                               | 0.056          | 0.022 | 0.001                               | 0.007          | 0.002 |
| 75                                                           | 75    | 0.042                               | 0.087          | 0.041 | 0.025                               | 0.055          | 0.025 | 0.004                               | 0.014          | 0.004 |
| 100                                                          | 100   | 0.048                               | 0.095          | 0.043 | 0.028                               | 0.066          | 0.027 | 0.005                               | 0.025          | 0.005 |
| 200                                                          | 200   | 0.033                               | 0.059          | 0.031 | 0.025                               | 0.050          | 0.024 | 0.022                               | 0.055          | 0.021 |
| 500                                                          | 500   | 0.048                               | 0.097          | 0.046 | 0.056                               | 0.101          | 0.051 | 0.050                               | 0.099          | 0.049 |
| $Se_1 = 0.9562, Sp_1 = 0.8312, Se_2 = 0.9562, Sp_2 = 0.8312$ |       |                                     |                |       |                                     |                |       |                                     |                |       |
| $0 \leq \rho^+ \leq 1, 0 \leq \rho^- \leq 1$                 |       |                                     |                |       |                                     |                |       |                                     |                |       |
| $p = 50\%$                                                   |       |                                     |                |       |                                     |                |       |                                     |                |       |
|                                                              |       | $\rho^+ = 0.25 \quad \rho^- = 0.25$ |                |       | $\rho^+ = 0.50 \quad \rho^- = 0.50$ |                |       | $\rho^+ = 0.75 \quad \rho^- = 0.75$ |                |       |
| $n_1$                                                        | $n_2$ | Global                              | $\alpha = 5\%$ | Bonf. | Global                              | $\alpha = 5\%$ | Bonf. | Global                              | $\alpha = 5\%$ | Bonf. |
| 50                                                           | 50    | 0.031                               | 0.072          | 0.031 | 0.014                               | 0.041          | 0.015 | 0.001                               | 0.007          | 0.001 |
| 50                                                           | 75    | 0.032                               | 0.069          | 0.033 | 0.022                               | 0.049          | 0.022 | 0.005                               | 0.015          | 0.005 |
| 50                                                           | 100   | 0.025                               | 0.057          | 0.026 | 0.025                               | 0.064          | 0.026 | 0.008                               | 0.025          | 0.008 |
| 75                                                           | 75    | 0.038                               | 0.081          | 0.037 | 0.027                               | 0.054          | 0.025 | 0.006                               | 0.017          | 0.006 |
| 100                                                          | 100   | 0.039                               | 0.084          | 0.038 | 0.031                               | 0.073          | 0.030 | 0.008                               | 0.030          | 0.009 |
| 200                                                          | 200   | 0.033                               | 0.059          | 0.031 | 0.025                               | 0.050          | 0.024 | 0.022                               | 0.055          | 0.021 |
| 500                                                          | 500   | 0.051                               | 0.099          | 0.049 | 0.050                               | 0.097          | 0.047 | 0.043                               | 0.087          | 0.042 |

296 Global: Global hypothesis test based on the chi-square distribution.

297  $\alpha = 5\%$  : Individual hypothesis tests each one to an error  $\alpha = 5\%$  .

298 Bonf.: Bonferroni's method.

299

300

301

302        Regarding the power of the hypothesis tests, in Tables 4 and 5 we can see some of the  
303 results obtained for the global test and other alternative methods (Section 2.3). Neither can we  
304 see in these Tables the results obtained applying Holm's method as they are practically the  
305 same as those obtained with Bonferroni's method. From the results, the following conclusions  
306 are obtained. The disease prevalence has an important effect on the power of each one of the  
307 methods to solve the global test, and the power increases with an increase in the prevalence.  
308 Regarding the correlations  $\rho^+$  and  $\rho^-$ , these do not have a clear effect on the power, and the  
309 power increases sometimes and decreases other times when the correlations increase. In very  
310 general terms, when the prevalence is relatively small ( $p=10\%$ ) we need large samples  
311 ( $n_i > 500$ ) so that the power of the global hypothesis test (equation (13)) is greater than 80%;  
312 for a prevalence of 25% with sample sizes  $n_i \geq 200$  we obtain a power greater than 80%; and  
313 for a very large prevalence ( $p=50\%$ ) with sample sizes  $n_i \geq 50$  we obtain a very higher  
314 power, greater than 80%-90%, depending on the difference between the PVs. The power of  
315 the method based on the individual hypothesis tests to an error  $\alpha = 5\%$  is greater than that of  
316 the global test based on the chi-square distribution due to the fact that its type I error is also  
317 greater. Regarding the hypothesis tests based on the individual tests with Bonferroni's method  
318 and Holm's method, their corresponding power is practically the same, and is also very  
319 similar to the power of the global test based on the chi-square distribution.

320

321

322

323

324

325



326

Table 4. Powers for  $PPV_1 = 0.75$ ,  $NPV_1 = 0.95$ ,  $PPV_2 = 0.60$  and  $NPV_2 = 0.95$ .

| $Se_1 = 0.5357$ , $Sp_1 = 0.9802$ , $Se_2 = 0.5455$ , $Sp_2 = 0.9596$<br>$0 \leq \rho^+ \leq 0.9805$ , $0 \leq \rho^- \leq 0.6933$<br>$p = 10\%$ |       |                                 |                |       |                                 |                |       |                                 |                |       |
|--------------------------------------------------------------------------------------------------------------------------------------------------|-------|---------------------------------|----------------|-------|---------------------------------|----------------|-------|---------------------------------|----------------|-------|
|                                                                                                                                                  |       | $\rho^+ = 0.25$ $\rho^- = 0.17$ |                |       | $\rho^+ = 0.49$ $\rho^- = 0.35$ |                |       | $\rho^+ = 0.74$ $\rho^- = 0.52$ |                |       |
| $n_1$                                                                                                                                            | $n_2$ | Global                          | $\alpha = 5\%$ | Bonf. | Global                          | $\alpha = 5\%$ | Bonf. | Global                          | $\alpha = 5\%$ | Bonf. |
| 50                                                                                                                                               | 50    | 0.025                           | 0.056          | 0.031 | 0.023                           | 0.049          | 0.024 | 0.005                           | 0.019          | 0.007 |
| 50                                                                                                                                               | 75    | 0.037                           | 0.077          | 0.036 | 0.029                           | 0.063          | 0.030 | 0.010                           | 0.030          | 0.011 |
| 50                                                                                                                                               | 100   | 0.054                           | 0.103          | 0.052 | 0.042                           | 0.084          | 0.038 | 0.019                           | 0.046          | 0.016 |
| 75                                                                                                                                               | 75    | 0.038                           | 0.078          | 0.038 | 0.032                           | 0.066          | 0.033 | 0.018                           | 0.042          | 0.018 |
| 100                                                                                                                                              | 100   | 0.053                           | 0.098          | 0.047 | 0.044                           | 0.081          | 0.037 | 0.031                           | 0.063          | 0.026 |
| 200                                                                                                                                              | 200   | 0.199                           | 0.276          | 0.180 | 0.208                           | 0.286          | 0.181 | 0.168                           | 0.252          | 0.138 |
| 500                                                                                                                                              | 500   | 0.495                           | 0.575          | 0.462 | 0.591                           | 0.668          | 0.556 | 0.720                           | 0.785          | 0.678 |
| $Se_1 = 0.8571$ , $Sp_1 = 0.9048$ , $Se_2 = 0.8727$ , $Sp_2 = 0.8061$<br>$0 \leq \rho^+ \leq 0.9354$ , $0 \leq \rho^- \leq 0.6614$<br>$p = 25\%$ |       |                                 |                |       |                                 |                |       |                                 |                |       |
|                                                                                                                                                  |       | $\rho^+ = 0.23$ $\rho^- = 0.17$ |                |       | $\rho^+ = 0.47$ $\rho^- = 0.33$ |                |       | $\rho^+ = 0.70$ $\rho^- = 0.50$ |                |       |
| $n_1$                                                                                                                                            | $n_2$ | Global                          | $\alpha = 5\%$ | Bonf. | Global                          | $\alpha = 5\%$ | Bonf. | Global                          | $\alpha = 5\%$ | Bonf. |
| 50                                                                                                                                               | 50    | 0.259                           | 0.335          | 0.230 | 0.254                           | 0.345          | 0.230 | 0.195                           | 0.334          | 0.210 |
| 50                                                                                                                                               | 75    | 0.409                           | 0.496          | 0.378 | 0.454                           | 0.543          | 0.424 | 0.467                           | 0.606          | 0.470 |
| 50                                                                                                                                               | 100   | 0.505                           | 0.584          | 0.462 | 0.598                           | 0.677          | 0.556 | 0.683                           | 0.776          | 0.675 |
| 75                                                                                                                                               | 75    | 0.416                           | 0.498          | 0.382 | 0.469                           | 0.557          | 0.436 | 0.501                           | 0.608          | 0.476 |
| 100                                                                                                                                              | 100   | 0.528                           | 0.606          | 0.488 | 0.625                           | 0.699          | 0.579 | 0.718                           | 0.793          | 0.685 |
| 200                                                                                                                                              | 200   | 0.822                           | 0.862          | 0.790 | 0.891                           | 0.923          | 0.873 | 0.974                           | 0.983          | 0.964 |
| 500                                                                                                                                              | 500   | 0.996                           | 0.999          | 0.996 | 1                               | 1              | 1     | 1                               | 1              | 1     |
| $Se_1 = 0.9643$ , $Sp_1 = 0.6786$ , $Se_2 = 0.9818$ , $Sp_2 = 0.3455$<br>$0 \leq \rho^+ \leq 0.7071$ , $0 \leq \rho^- \leq 0.5$<br>$p = 50\%$    |       |                                 |                |       |                                 |                |       |                                 |                |       |
|                                                                                                                                                  |       | $\rho^+ = 0.18$ $\rho^- = 0.13$ |                |       | $\rho^+ = 0.35$ $\rho^- = 0.25$ |                |       | $\rho^+ = 0.53$ $\rho^- = 0.38$ |                |       |
| $n_1$                                                                                                                                            | $n_2$ | Global                          | $\alpha = 5\%$ | Bonf. | Global                          | $\alpha = 5\%$ | Bonf. | Global                          | $\alpha = 5\%$ | Bonf. |
| 50                                                                                                                                               | 50    | 0.890                           | 0.939          | 0.893 | 0.935                           | 0.969          | 0.941 | 0.977                           | 0.989          | 0.978 |
| 50                                                                                                                                               | 75    | 0.978                           | 0.990          | 0.977 | 0.995                           | 0.997          | 0.993 | 0.999                           | 0.999          | 0.999 |
| 50                                                                                                                                               | 100   | 0.995                           | 0.998          | 0.995 | 0.999                           | 0.998          | 0.999 | 1                               | 1              | 1     |
| 75                                                                                                                                               | 75    | 0.984                           | 0.992          | 0.983 | 0.995                           | 0.999          | 0.994 | 0.999                           | 1              | 0.999 |
| 100                                                                                                                                              | 100   | 0.998                           | 0.999          | 0.998 | 1                               | 1              | 0.999 | 1                               | 1              | 1     |
| 200                                                                                                                                              | 200   | 1                               | 1              | 1     | 1                               | 1              | 1     | 1                               | 1              | 1     |
| 500                                                                                                                                              | 500   | 1                               | 1              | 1     | 1                               | 1              | 1     | 1                               | 1              | 1     |

327 Global: Global hypothesis test based on the chi-square distribution.

328  $\alpha = 5\%$  : Individual hypothesis tests each one to an error  $\alpha = 5\%$ .

329 Bonf.: Bonferroni's method.

330

331

332

333

334

Table 5. Powers for  $PPV_1 = 0.95$ ,  $NPV_1 = 0.95$ ,  $PPV_2 = 0.75$  and  $NPV_2 = 0.95$ .

| $Se_1 = 0.5278$ , $Sp_1 = 0.9969$ , $Se_2 = 0.5357$ , $Sp_2 = 0.9802$ |       |                                 |                |       |                                 |                |       |                                 |                |       |
|-----------------------------------------------------------------------|-------|---------------------------------|----------------|-------|---------------------------------|----------------|-------|---------------------------------|----------------|-------|
| $0 \leq \rho^+ \leq 0.9841$ , $0 \leq \rho^- \leq 0.3910$             |       |                                 |                |       |                                 |                |       |                                 |                |       |
| $p = 10\%$                                                            |       |                                 |                |       |                                 |                |       |                                 |                |       |
|                                                                       |       | $\rho^+ = 0.25$ $\rho^- = 0.10$ |                |       | $\rho^+ = 0.49$ $\rho^- = 0.19$ |                |       | $\rho^+ = 0.74$ $\rho^- = 0.29$ |                |       |
| $n_1$                                                                 | $n_2$ | Global                          | $\alpha = 5\%$ | Bonf. | Global                          | $\alpha = 5\%$ | Bonf. | Global                          | $\alpha = 5\%$ | Bonf. |
| 50                                                                    | 50    | 0.030                           | 0.059          | 0.030 | 0.019                           | 0.048          | 0.020 | 0.007                           | 0.019          | 0.008 |
| 50                                                                    | 75    | 0.031                           | 0.063          | 0.032 | 0.023                           | 0.054          | 0.023 | 0.009                           | 0.024          | 0.009 |
| 50                                                                    | 100   | 0.033                           | 0.064          | 0.033 | 0.030                           | 0.063          | 0.030 | 0.010                           | 0.031          | 0.009 |
| 75                                                                    | 75    | 0.033                           | 0.057          | 0.032 | 0.025                           | 0.055          | 0.025 | 0.015                           | 0.036          | 0.015 |
| 100                                                                   | 100   | 0.034                           | 0.067          | 0.033 | 0.026                           | 0.059          | 0.026 | 0.026                           | 0.054          | 0.026 |
| 200                                                                   | 200   | 0.123                           | 0.182          | 0.094 | 0.122                           | 0.177          | 0.095 | 0.108                           | 0.168          | 0.078 |
| 500                                                                   | 500   | 0.666                           | 0.770          | 0.662 | 0.669                           | 0.781          | 0.667 | 0.699                           | 0.811          | 0.696 |
| $Se_1 = 0.8444$ , $Sp_1 = 0.9852$ , $Se_2 = 0.8571$ , $Sp_2 = 0.9048$ |       |                                 |                |       |                                 |                |       |                                 |                |       |
| $0 \leq \rho^+ \leq 0.9511$ , $0 \leq \rho^- \leq 0.3779$             |       |                                 |                |       |                                 |                |       |                                 |                |       |
| $p = 25\%$                                                            |       |                                 |                |       |                                 |                |       |                                 |                |       |
|                                                                       |       | $\rho^+ = 0.24$ $\rho^- = 0.09$ |                |       | $\rho^+ = 0.48$ $\rho^- = 0.19$ |                |       | $\rho^+ = 0.71$ $\rho^- = 0.28$ |                |       |
| $n_1$                                                                 | $n_2$ | Global                          | $\alpha = 5\%$ | Bonf. | Global                          | $\alpha = 5\%$ | Bonf. | Global                          | $\alpha = 5\%$ | Bonf. |
| 50                                                                    | 50    | 0.172                           | 0.247          | 0.142 | 0.154                           | 0.234          | 0.127 | 0.107                           | 0.198          | 0.097 |
| 50                                                                    | 75    | 0.422                           | 0.537          | 0.396 | 0.398                           | 0.521          | 0.378 | 0.365                           | 0.541          | 0.367 |
| 50                                                                    | 100   | 0.627                           | 0.734          | 0.615 | 0.641                           | 0.755          | 0.638 | 0.674                           | 0.779          | 0.653 |
| 75                                                                    | 75    | 0.434                           | 0.549          | 0.400 | 0.432                           | 0.555          | 0.410 | 0.402                           | 0.552          | 0.391 |
| 100                                                                   | 100   | 0.635                           | 0.753          | 0.634 | 0.655                           | 0.774          | 0.656 | 0.666                           | 0.796          | 0.683 |
| 200                                                                   | 200   | 0.965                           | 0.981          | 0.964 | 0.977                           | 0.987          | 0.974 | 0.989                           | 0.994          | 0.988 |
| 500                                                                   | 500   | 1                               | 1              | 1     | 1                               | 1              | 1     | 1                               | 1              | 1     |
| $Se_1 = 0.95$ , $Sp_1 = 0.95$ , $Se_2 = 0.9643$ , $Sp_2 = 0.6786$     |       |                                 |                |       |                                 |                |       |                                 |                |       |
| $0 \leq \rho^+ \leq 0.8388$ , $0 \leq \rho^- \leq 0.3333$             |       |                                 |                |       |                                 |                |       |                                 |                |       |
| $p = 50\%$                                                            |       |                                 |                |       |                                 |                |       |                                 |                |       |
|                                                                       |       | $\rho^+ = 0.21$ $\rho^- = 0.08$ |                |       | $\rho^+ = 0.42$ $\rho^- = 0.17$ |                |       | $\rho^+ = 0.63$ $\rho^- = 0.25$ |                |       |
| $n_1$                                                                 | $n_2$ | Global                          | $\alpha = 5\%$ | Bonf. | Global                          | $\alpha = 5\%$ | Bonf. | Global                          | $\alpha = 5\%$ | Bonf. |
| 50                                                                    | 50    | 0.929                           | 0.969          | 0.942 | 0.954                           | 0.983          | 0.966 | 0.965                           | 0.992          | 0.978 |
| 50                                                                    | 75    | 0.994                           | 0.998          | 0.995 | 0.999                           | 0.999          | 0.999 | 0.999                           | 1              | 0.999 |
| 50                                                                    | 100   | 1                               | 1              | 1     | 1                               | 1              | 1     | 1                               | 1              | 1     |
| 75                                                                    | 75    | 0.995                           | 0.998          | 0.995 | 0.997                           | 0.999          | 0.998 | 1                               | 1              | 1     |
| 100                                                                   | 100   | 1                               | 1              | 1     | 1                               | 1              | 1     | 1                               | 1              | 1     |
| 200                                                                   | 200   | 1                               | 1              | 1     | 1                               | 1              | 1     | 1                               | 1              | 1     |
| 500                                                                   | 500   | 1                               | 1              | 1     | 1                               | 1              | 1     | 1                               | 1              | 1     |

335 Global: Global hypothesis test based on the chi-square distribution.

336  $\alpha = 5\%$ : Individual hypothesis tests each one to an error  $\alpha = 5\%$ .

337 Bonf.: Bonferroni's method.

338

339 As conclusions of the results obtained in the simulation experiments, the global hypothesis

340 test based on the chi-square distribution behaves well in terms of the type I error (it does not

341 overwhelm the nominal error of 5%), the same as the individual tests along with Bonferroni's

342 method or Holm's method. The method based on the individual tests to a global error  $\alpha = 5\%$   
343 should not be used as it may clearly overwhelm the nominal error.

344 From the results obtained, we propose the following method to compare the PVs of two  
345 BDTs subject to a case-control sampling: 1) Applying the hypothesis test based on the chi-  
346 square distribution (equation (13)) to an error  $\alpha$ , 2) If the global hypothesis test is not  
347 significant, the equality hypothesis of the PVs is not rejected; if the global hypothesis test is  
348 significant to an error  $\alpha$ , the investigation of the causes of the significance is made by testing  
349 the individual tests (equation (14)) and applying Bonferroni's method or Holm's method to an  
350 error  $\alpha$ .

351

### 352 3.2. Effect of the prevalence

353 The estimation and comparison of the PVs of two BDTs subject to a case-control sampling  
354 requires knowledge of the disease prevalence, of an estimation of the disease prevalence  
355 obtained from another study, e.g. a health survey. To study the effect of a misspecification of  
356 the prevalence in the comparison of the PVs of two BDTs and in the estimators of the PVs,  
357 we carried out simulation experiments similar to those made to study the type I errors and the  
358 powers. For this purpose, we took as the prevalence for the inference an overestimation (and  
359 an underestimation) equal to 5% and to 10% of the value of the prevalence set, and we have  
360 studied the type I errors and the powers of the global test and of the Bonferroni and Holm  
361 methods and the relative root mean square error (*RRMSE*) of the estimator of each PVs. Thus,  
362 for each estimator we calculated the relative root mean square error (*RRMSE*) defined as

$$363 \quad RRMSE(\hat{P}V_i) = \frac{\sqrt{\frac{1}{N} \sum_{k=1}^N (\hat{P}V_{ik} - PV_i)^2}}{PV_i},$$

364 where  $PV_i$  is the PPV or the NPV of the  $i$ th BDT ( $i=1,2$ ) and  $\hat{P}V_{ik}$  is its estimator  
365 calculated from the  $k$ th sample ( $k=1,\dots,N$ ), and  $N=10,000$ . For the values of the  
366 parameters we took as prevalences  $p=\{10\%,25\%,50\%\}$  respectively, and to estimate the  
367 PVs we took as prevalences  $p'=p\pm d\times p$  with  $d=\{5\%,10\%\}$ .

368 In Table 6, we show some of the results obtained for the type I errors and the powers of the  
369 global test and the Bonferroni method (the results of the Holms method are not shown as they  
370 are practically identically to those obtained with the Bonferroni method). In the Table we  
371 show the results when there is no misspecification of the prevalence ( $p'=p$ ) and when the  
372 prevalence is underestimated ( $p'<p$ ) and overestimated ( $p'>p$ ). From the results of these  
373 experiments, it is verified that the type I errors of the methods studied do not overwhelm the  
374 nominal error  $\alpha=5\%$ , and in general terms there are no important differences between the  
375 type I errors when there is a misspecification of the prevalence and when there is not.  
376 Regarding the powers, the conclusions are also very similar: there are no important  
377 differences between the powers when there is a misspecification of the prevalence and when  
378 there is not. Regarding the estimators, in Table 6 we show some of the results obtained for the  
379 RRMSEs (in %) of the estimators of the PVs of the two BDTs. There is no important  
380 difference between the RRMSEs when there is a misspecification of the prevalence ( $p'<p$   
381 or  $p'>p$ ) and the RRMSEs when there is no misspecification of the prevalence ( $p'=p$ ). In  
382 general terms, this difference is not usually over 5% when the samples are small, and this is  
383 even lower when the samples are large. Consequently, misspecifications (5% or 10%) of the  
384 disease prevalence do not have any important effect on the type I errors and on the powers of  
385 the global hypothesis test and on the alternative methods (Bonferroni and Holm), and nor do  
386 they have an important effect on the estimators of the PVs.

387

388

Table 6. Effect of a misspecification of the prevalence.

| Type I errors                                                                                        |       |                 |               |                |               |                |               |                |               |                |               |
|------------------------------------------------------------------------------------------------------|-------|-----------------|---------------|----------------|---------------|----------------|---------------|----------------|---------------|----------------|---------------|
| $PPV_1 = PPV_2 = 0.90, NPV_1 = NPV_2 = 0.80$                                                         |       |                 |               |                |               |                |               |                |               |                |               |
| $Se_1 = 0.2571, Sp_1 = 0.9905, Se_2 = 0.2571, Sp_2 = 0.9905, \rho^+ = 0.75, \rho^- = 0.75, p = 25\%$ |       |                 |               |                |               |                |               |                |               |                |               |
|                                                                                                      |       | $p' = p = 25\%$ |               | $p' = 22.50\%$ |               | $p' = 23.75\%$ |               | $p' = 26.25\%$ |               | $p' = 27.50\%$ |               |
| $n_1$                                                                                                | $n_2$ | Global          | Bonf.         | Global         | Bonf.         | Global         | Bonf.         | Global         | Bonf.         | Global         | Bonf.         |
| 50                                                                                                   | 50    | 0.001           | 0.001         | 0.001          | 0.002         | 0.001          | 0.001         | 0.001          | 0.001         | 0.001          | 0.001         |
| 50                                                                                                   | 75    | 0.001           | 0.002         | 0.001          | 0.002         | 0.001          | 0.002         | 0.001          | 0.002         | 0.001          | 0.002         |
| 50                                                                                                   | 100   | 0.002           | 0.003         | 0.002          | 0.003         | 0.002          | 0.003         | 0.002          | 0.003         | 0.002          | 0.003         |
| 75                                                                                                   | 75    | 0.003           | 0.007         | 0.003          | 0.008         | 0.003          | 0.008         | 0.003          | 0.007         | 0.003          | 0.007         |
| 100                                                                                                  | 100   | 0.006           | 0.010         | 0.006          | 0.011         | 0.006          | 0.011         | 0.006          | 0.010         | 0.006          | 0.009         |
| 200                                                                                                  | 200   | 0.010           | 0.020         | 0.010          | 0.020         | 0.010          | 0.020         | 0.010          | 0.019         | 0.010          | 0.019         |
| 500                                                                                                  | 500   | 0.020           | 0.024         | 0.020          | 0.024         | 0.020          | 0.024         | 0.020          | 0.024         | 0.020          | 0.023         |
| Powers                                                                                               |       |                 |               |                |               |                |               |                |               |                |               |
| $PPV_1 = 0.90, PPV_2 = 0.70, NPV_1 = 0.80, NPV_2 = 0.90$                                             |       |                 |               |                |               |                |               |                |               |                |               |
| $Se_1 = 0.2571, Sp_1 = 0.9905, Se_2 = 0.70, Sp_2 = 0.90, \rho^+ = 0.29, \rho^- = 0.22, p = 25\%$     |       |                 |               |                |               |                |               |                |               |                |               |
|                                                                                                      |       | $p' = p = 25\%$ |               | $p' = 22.50\%$ |               | $p' = 23.75\%$ |               | $p' = 26.25\%$ |               | $p' = 27.50\%$ |               |
| $n_1$                                                                                                | $n_2$ | Global          | Bonf.         | Global         | Bonf.         | Global         | Bonf.         | Global         | Bonf.         | Global         | Bonf.         |
| 50                                                                                                   | 50    | 0.999           | 0.992         | 0.999          | 0.993         | 0.999          | 0.992         | 0.999          | 0.992         | 0.999          | 0.991         |
| 50                                                                                                   | 75    | 1               | 0.996         | 1              | 0.995         | 1              | 0.996         | 1              | 0.996         | 1              | 0.995         |
| 50                                                                                                   | 100   | 1               | 0.998         | 1              | 0.997         | 1              | 0.997         | 1              | 0.998         | 1              | 0.998         |
| 75                                                                                                   | 75    | 1               | 1             | 1              | 1             | 1              | 1             | 1              | 1             | 1              | 1             |
| 100                                                                                                  | 100   | 1               | 1             | 1              | 1             | 1              | 1             | 1              | 1             | 1              | 1             |
| 200                                                                                                  | 200   | 1               | 1             | 1              | 1             | 1              | 1             | 1              | 1             | 1              | 1             |
| 500                                                                                                  | 500   | 1               | 1             | 1              | 1             | 1              | 1             | 1              | 1             | 1              | 1             |
| RRMSEs of the estimators of PVs of BDT 1                                                             |       |                 |               |                |               |                |               |                |               |                |               |
| $PPV_1 = 0.90, PPV_2 = 0.70, NPV_1 = 0.80, NPV_2 = 0.90$                                             |       |                 |               |                |               |                |               |                |               |                |               |
| $Se_1 = 0.2571, Sp_1 = 0.9905, Se_2 = 0.70, Sp_2 = 0.90, \rho^+ = 0.29, \rho^- = 0.22, p = 25\%$     |       |                 |               |                |               |                |               |                |               |                |               |
|                                                                                                      |       | $p' = p = 25\%$ |               | $p' = 22.50\%$ |               | $p' = 23.75\%$ |               | $p' = 26.25\%$ |               | $p' = 27.50\%$ |               |
| $n_1$                                                                                                | $n_2$ | $\hat{PPV}_1$   | $\hat{NPV}_1$ | $\hat{PPV}_1$  | $\hat{NPV}_1$ | $\hat{PPV}_1$  | $\hat{NPV}_1$ | $\hat{PPV}_1$  | $\hat{NPV}_1$ | $\hat{PPV}_1$  | $\hat{NPV}_1$ |
| 50                                                                                                   | 50    | 26.8            | 1.8           | 31.1           | 2.7           | 29.3           | 2.1           | 28.3           | 2.1           | 29.7           | 3.2           |
| 50                                                                                                   | 75    | 20.0            | 1.7           | 22.9           | 2.9           | 21.6           | 2.0           | 20.9           | 2.3           | 21.8           | 3.1           |
| 50                                                                                                   | 100   | 15.6            | 1.6           | 18.3           | 3.0           | 16.8           | 1.9           | 15.9           | 2.2           | 17.8           | 3.0           |
| 75                                                                                                   | 75    | 18.4            | 1.4           | 22.3           | 2.5           | 21.2           | 1.7           | 19.3           | 2.0           | 21.9           | 2.8           |
| 100                                                                                                  | 100   | 14.2            | 1.2           | 18.0           | 2.2           | 16.0           | 1.6           | 14.9           | 1.9           | 17.1           | 2.5           |
| 200                                                                                                  | 200   | 8.0             | 0.9           | 9.4            | 1.8           | 8.9            | 1.5           | 8.5            | 1.6           | 8.9            | 1.9           |
| 500                                                                                                  | 500   | 4.1             | 0.5           | 5.4            | 1.5           | 4.6            | 1.2           | 4.5            | 1.2           | 5.1            | 1.6           |
| RRMSEs of the estimators of PVs of BDT 2                                                             |       |                 |               |                |               |                |               |                |               |                |               |
|                                                                                                      |       | $p' = p = 25\%$ |               | $p' = 22.50\%$ |               | $p' = 23.75\%$ |               | $p' = 26.25\%$ |               | $p' = 27.50\%$ |               |
| $n_1$                                                                                                | $n_2$ | $\hat{PPV}_2$   | $\hat{NPV}_2$ | $\hat{PPV}_2$  | $\hat{NPV}_2$ | $\hat{PPV}_2$  | $\hat{NPV}_2$ | $\hat{PPV}_2$  | $\hat{NPV}_2$ | $\hat{PPV}_2$  | $\hat{NPV}_2$ |
| 50                                                                                                   | 50    | 10.8            | 2.3           | 14.3           | 2.4           | 13.0           | 2.3           | 11.4           | 2.6           | 13.6           | 2.7           |
| 50                                                                                                   | 75    | 10.3            | 2.2           | 12.4           | 2.2           | 11.1           | 2.2           | 10.8           | 2.5           | 11.8           | 2.6           |
| 50                                                                                                   | 100   | 9.1             | 2.0           | 11.0           | 2.1           | 9.8            | 2.1           | 9.6            | 2.5           | 11.3           | 2.5           |
| 75                                                                                                   | 75    | 10.0            | 1.8           | 12.1           | 2.0           | 10.9           | 1.9           | 10.5           | 2.1           | 12.4           | 2.3           |
| 100                                                                                                  | 100   | 8.9             | 1.6           | 10.6           | 1.8           | 9.5            | 1.7           | 9.3            | 1.9           | 10.9           | 2.1           |
| 200                                                                                                  | 200   | 6.7             | 1.1           | 8.0            | 1.6           | 6.9            | 1.2           | 7.0            | 1.4           | 8.1            | 1.7           |
| 500                                                                                                  | 500   | 4.5             | 0.7           | 5.5            | 1.3           | 4.7            | 0.9           | 4.7            | 1.0           | 5.5            | 1.5           |

389 Global: Global hypothesis test based on the chi-square distribution.

390 Bonf.: Bonferroni's method.

391

392

#### 393 4. Example

394 The results obtained were applied to the study by Matovu et al (2010) on the diagnosis of  
 395 Human African Trypanosomiasis (HAT) in Uganda. HAT, also known as sleeping sickness, is  
 396 a parasitic disease caused by protozoa belonging to the genus Trypanosoma, and it is  
 397 transmitted to human beings by a bite from the tsetse fly (genus Glossina) infected by other  
 398 people or animals that host human pathogenic parasites. In some rural areas of Africa, the  
 399 disease prevalence may reach 50% in periods of epidemics, and is a significant cause of death.  
 400 Matovu et al (2010) applied two diagnostic tests to a sample of 75 cases and another sample  
 401 of 65 controls. In Table 7 (observed frequencies) we can see the frequencies obtained  
 402 (constructed from the data provided by Matovu et al) when applying the *PCR-*  
 403 *Oligochromatography* (*PCR-OC*, variable  $T_1$ ) test and the *NASBA-Oligochromatography*  
 404 (*NASBA-OC*, variable  $T_2$ ) test to both samples of individuals. In order to illustrate the method  
 405 proposed in this article, two values were considered for the prevalence of HAT: 10% and  
 406 50%. The first case ( $p = 10\%$ ) corresponds to a situation of low disease prevalence, and the  
 407 second one ( $p = 50\%$ ) corresponds to a situation of a HAT epidemic. In Table 7, we can also  
 408 see the estimations of the sensitivities and the specificities (and their standard errors, SE) of  
 409 the BDTs and the correlations.

410

411 Table 7. Study by Matuvu et al.

| Observed frequencies                          |                     |                |                     |                     |                |           |       |
|-----------------------------------------------|---------------------|----------------|---------------------|---------------------|----------------|-----------|-------|
| Case                                          |                     |                | Control             |                     |                |           |       |
|                                               | $T_2 = 1$           | $T_2 = 0$      | Total               |                     | $T_2 = 1$      | $T_2 = 0$ | Total |
| $T_1 = 1$                                     | 57                  | 4              | 61                  | $T_1 = 1$           | 1              | 4         | 5     |
| $T_1 = 0$                                     | 6                   | 8              | 14                  | $T_1 = 0$           | 0              | 60        | 60    |
| Total                                         | 63                  | 12             | 75                  | Total               | 1              | 64        | 65    |
| Sensitivities, specificities and correlations |                     |                |                     |                     |                |           |       |
| $\hat{S}e_1 \pm SE$                           | $\hat{S}e_2 \pm SE$ | $\hat{\rho}^+$ | $\hat{S}p_1 \pm SE$ | $\hat{S}p_2 \pm SE$ | $\hat{\rho}^-$ |           |       |
| $0.813 \pm 0.045$                             | $0.840 \pm 0.042$   | 0.538          | $0.923 \pm 0.033$   | $0.985 \pm 0.015$   | 0.433          |           |       |

412 For a prevalence value equal to 10%, the estimations of the PVs are  $\hat{PPV}_1 = 0.540$ ,  
413  $\hat{PPV}_2 = 0.858$ ,  $\hat{NPV}_1 = 0.978$  and  $\hat{NPV}_2 = 0.982$ , and the estimated variance and covariance  
414 matrix of the estimators of the PVs is

$$415 \quad \hat{\Sigma}_{\hat{\omega}} = \begin{pmatrix} 0.01158 & 0.00562 & 0.00015 & 0.00005 \\ 0.00562 & 0.01456 & 0.00006 & 0.00006 \\ 0.00015 & 0.00006 & 0.00003 & 0.00001 \\ 0.00005 & 0.00006 & 0.00001 & 0.00002 \end{pmatrix}.$$

416 The value of the test statistic for the test

$$417 \quad \begin{aligned} H_0 : PPV_1 = PPV_2 \quad \text{and} \quad NPV_1 = NPV_2 \\ H_1 : \text{at least one equality is not true,} \end{aligned}$$

418 is  $Q^2 = 6.954$  ( $P$ -value = 0.031) and therefore null hypothesis of the global test is rejected.

419 Testing the individual hypothesis tests it is found that the value of the test statistic for the

420  $H_0 : PPV_1 = PPV_2$  is equal to 2.606 (two sided p-value = 0.009), and that the value of the test

421 statistic for the test  $H_0 : NPV_1 = NPV_2$  is equal to 0.886 (two sided p-value = 0.375).

422 Applying Bonferroni's (Holm's) method the equality hypothesis of the negative predictive

423 values is not rejected and the equality hypothesis of the two positive predictive values is

424 rejected. The positive predictive value of the *NASBA-OC* test is significantly greater than that

425 of the *PCR-OC* test (95% CI: 0.079 to 0.558).

426 For a HAT prevalence equal to 50%, the estimations of the PVs are  $\hat{PPV}_1 = 0.914$ ,

427  $\hat{PPV}_2 = 0.982$ ,  $\hat{NPV}_1 = 0.834$  and  $\hat{NPV}_2 = 0.860$ , and estimated variance and covariance

428 matrix of the estimators of the PVs is

$$429 \quad \hat{\Sigma}_{\hat{\omega}} = \begin{pmatrix} 0.00117 & 0.00026 & 0.00032 & 0.00010 \\ 0.00026 & 0.00031 & 0.00005 & 0.00006 \\ 0.00032 & 0.00005 & 0.00116 & 0.00058 \\ 0.00010 & 0.00006 & 0.00058 & 0.00102 \end{pmatrix}.$$

430 The value of the test statistic for the test

431 
$$H_0 : PPV_1 = PPV_2 \text{ and } NPV_1 = NPV_2$$
$$H_1 : \text{at least one equality is not true,}$$

432 is  $Q^2 = 5.048$  ( $P\text{-value} = 0.080$ ), and therefore with an error  $\alpha = 5\%$  we do not reject the  
433 equality of the positive predictive values and the negative predictive values of both diagnostic  
434 tests, although there are signs of significance and, therefore, an increase in the two sample  
435 sizes may be necessary. Solving the individual hypothesis tests it is found that the value of the  
436 test statistic for the test  $H_0 : PPV_1 = PPV_2$  is equal to 2.21 (two sided p-value = 0.027), and  
437 that the value of the test statistic for the  $H_0 : NPV_1 = NPV_2$  is equal to 0.892  
438 (two sided p-value = 0.373). If each individual hypothesis test is solved to an error  $\alpha = 5\%$ ,  
439 then  $H_0 : PPV_1 = PPV_2$  is rejected and  $H_0 : NPV_1 = NPV_2$  is not rejected, and the result is  
440 contradictory to that obtained with the global test to an error  $\alpha = 5\%$ .

441

## 442 **6. More than two BDTs**

443 Let us consider that  $J$  BDTs ( $J \geq 3$ ) are applied to all of the individuals in the case sample  
444 and the control sample. For each BDT we define the random variable  $T_j$  in a similar way to  
445 how this was done in Section 2. Let  $Se_j$  and  $Sp_j$  be the sensitivity and the specificity of the  
446  $j$ th BDT, with  $\text{con } j = 1, \dots, J$ . Let  $n_{1i_1 \dots i_J}$  be the number of individuals with the disease for  
447 whom  $T_1 = i_1, \dots, T_J = i_J$ , with  $i_j = 1$  when the result of the  $j$ th BDT is positive and  $i_j = 0$   
448 when it is negative. In a similar way,  $n_{2i_1 \dots i_J}$  is the number of without the disease for whom  
449  $T_1 = i_1, \dots, T_J = i_J$ . Let us consider the probabilities  $\xi_{hi_1 \dots i_J} = P(T_1 = i_1, T_2 = i_2, \dots, T_J = i_J)$ , with  
450  $h = 1, 2$ . Thus, for example for three BDTs, using the dependence model of Torrance-Rynard  
451 and Walter (1997), these probabilities are



452 
$$\xi_{1i_1i_2i_3} = \prod_{j=1}^3 Se_j^{i_j} (1 - Se_j)^{1-i_j} + \sum_{j,k,j < k}^3 (-1)^{|i_j - i_k|} \varepsilon_{jk}^+$$

453 and

454 
$$\xi_{2i_1i_2i_3} = \prod_{j=1}^3 Sp_j^{1-i_j} (1 - Sp_j)^{i_j} + \sum_{j,k,j < k}^3 (-1)^{|i_j - i_k|} \varepsilon_{jk}^- ,$$

455 with  $i_j = 0,1$ ,  $i_k = 0,1$  and  $j, k = 1,2,3$ , and where  $\varepsilon_{jk}^+$  ( $\varepsilon_{jk}^-$ ) is the covariance between the  $j$ th

456 BDT and the  $k$ th BDT for individuals with the disease (without the disease). The estimators of

457 these probabilities are  $\hat{\xi}_{hi_1 \dots i_j} = n_{hi_1 \dots i_j} / n_h$ , with  $h = 1,2$ . The sensitivity and the specificity of

458 the  $j$ th BDT are

459 
$$Se_j = \sum_{\substack{i_1, \dots, i_j=0 \\ i_j=1}}^1 \xi_{1i_1, \dots, i_j} \quad \text{and} \quad Sp_j = \sum_{\substack{i_1, \dots, i_j=0 \\ i_j=0}}^1 \xi_{2i_1, \dots, i_j} ,$$

460 and its estimators are

461 
$$\hat{Se}_j = \frac{\sum_{\substack{i_1, \dots, i_j=0 \\ i_j=1}}^1 n_{1i_1, \dots, i_j}}{n_1} \quad \text{and} \quad \hat{Sp}_j = \frac{\sum_{\substack{i_1, \dots, i_j=0 \\ i_j=0}}^1 n_{2i_1, \dots, i_j}}{n_2} .$$

462 The estimators of the variances-covariances of these estimators are

463 
$$\hat{Var}(\hat{Se}_j) = \hat{Se}_j (1 - \hat{Se}_j) / n_1, \quad \hat{Var}(\hat{Sp}_j) = \hat{Sp}_j (1 - \hat{Sp}_j) / n_2, \quad \hat{Cov}(\hat{Se}_j, \hat{Se}_k) = \hat{\varepsilon}_{jk}^+ / n_1 \quad \text{and}$$

464 
$$\hat{Cov}(\hat{Sp}_j, \hat{Sp}_k) = \hat{\varepsilon}_{jk}^- / n_2, \quad \text{and the rest of the covariances are equal to zero. If we know the}$$

465 prevalence  $p$  (or and an estimation), the estimators of the PVs of the  $j$ th BDT are

466 
$$\hat{PPV}_j = \frac{pn_2 \sum_{\substack{i_1, \dots, i_j=0 \\ i_j=1}}^1 n_{1i_1, \dots, i_j}}{pn_2 \sum_{\substack{i_1, \dots, i_j=0 \\ i_j=1}}^1 n_{1i_1, \dots, i_j} + qn_1 \sum_{\substack{i_1, \dots, i_j=0 \\ i_j=1}}^1 n_{2i_1, \dots, i_j}}$$

467 and

$$\hat{NPV}_j = \frac{qn_1 \sum_{\substack{i_1, \dots, i_J=0 \\ i_j=0}}^1 n_{2i_1, \dots, i_J}}{qn_1 \sum_{\substack{i_1, \dots, i_J=0 \\ i_j=0}}^1 n_{2i_1, \dots, i_J} + pn_2 \sum_{\substack{i_1, \dots, i_J=0 \\ i_j=0}}^1 n_{1i_1, \dots, i_J}}.$$

Let  $\boldsymbol{\theta} = (Se_1, \dots, Se_J, Sp_1, \dots, Sp_J)^T$  be the vector whose components are the sensitivities and the specificities, and let  $\boldsymbol{\omega} = (PPV_1, \dots, PPV_J, NPV_1, \dots, NPV_J)^T$  be the vector whose components are the PVs. The variance-covariance matrix of  $\hat{\boldsymbol{\theta}}$ , with a dimension  $2J \times 2J$ , is similar to that given in expression (10), where  $\Sigma_{\hat{Se}}$  and  $\Sigma_{\hat{Sp}}$  are matrixes with a dimension  $J \times J$ . Applying the delta method, the variance-covariance matrix of  $\hat{\boldsymbol{\omega}}$ , with a dimension  $2J \times 2J$ , has an expression similar to that given in equation (11).

The PVs of each one of the  $J$  BDTs depend on the same parameters (the sensitivity and the specificity of the  $j$ th diagnostic test) and, therefore, these parameters can be compared simultaneously. The global hypothesis test to simultaneously compare the PVs of the  $J$  BDTs is

$$H_0 : PPV_1 = PPV_2 = \dots = PPV_J \text{ and } NPV_1 = NPV_2 = \dots = NPV_J$$

$$H_1 : \text{at least one equality is not true,}$$

which is equivalent to the hypothesis test

$$H_0 : \mathbf{A}\boldsymbol{\omega} = 0 \text{ vs } H_1 : \mathbf{A}\boldsymbol{\omega} \neq 0$$

where the matrix  $\mathbf{A}$ , with a dimension  $2(J-1) \times 2J$ , is

$$\mathbf{A} = \begin{pmatrix} \mathbf{A}_1 & \mathbf{A}_0 \\ \mathbf{A}_0 & \mathbf{A}_1 \end{pmatrix},$$

where  $\mathbf{A}_0$  is a matrix with a dimension  $(J-1) \times J$  whose elements are all equal to 0, and  $\mathbf{A}_1$  is a matrix with a dimension  $(J-1) \times J$  where each component  $(i, i)$  is equal to 1, each element  $(i, i+1)$  is equal to  $-1$  for  $i = 1, \dots, J-1$ , and the rest of the elements in this matrix

487 are equal to 0. Applying the multivariate central limit theorem it is verified that  
 488  $\sqrt{n_1 + n_2} (\hat{\boldsymbol{\omega}} - \boldsymbol{\omega}) \xrightarrow{n_1 + n_2 \rightarrow \infty} N_{2J}(\mathbf{0}, \boldsymbol{\Sigma}_{\boldsymbol{\omega}})$ . Then, the statistic  $Q^2 = (\hat{\boldsymbol{\omega}}\mathbf{A})^T (\mathbf{A} \hat{\boldsymbol{\Sigma}}_{\hat{\boldsymbol{\omega}}} \mathbf{A}^T)^{-1} \mathbf{A} \hat{\boldsymbol{\omega}}$  is  
 489 distributed according to Hotelling's  $T$ -squared distribution with a dimension  $2(J-1)$  and  
 490  $n_1 + n_2$  degrees of freedom, where  $2(J-1)$  is the dimension of the vector  $\mathbf{A} \hat{\boldsymbol{\omega}}$ . When  $n_1 + n_2$   
 491 is large, the statistic  $Q^2$  is distributed according to a central chi-squared distribution with  
 492  $2(J-1)$  degrees of freedom when the null hypothesis is true, i.e.

$$493 \quad Q^2 = (\hat{\boldsymbol{\omega}}\mathbf{A})^T (\mathbf{A} \hat{\boldsymbol{\Sigma}}_{\hat{\boldsymbol{\omega}}} \mathbf{A}^T)^{-1} \mathbf{A} \hat{\boldsymbol{\omega}} \xrightarrow{n \rightarrow \infty} \chi_{2(J-1)}^2.$$

494 Finally, the method to compare the PVs of the  $J$  BDTs would consist of the following steps:  
 495 1) Solve the global hypothesis test to an error  $\alpha$  calculating the statistic  
 496  $Q^2 = (\hat{\boldsymbol{\omega}}\mathbf{A})^T (\mathbf{A} \hat{\boldsymbol{\Sigma}}_{\hat{\boldsymbol{\omega}}} \mathbf{A}^T)^{-1} \mathbf{A} \hat{\boldsymbol{\omega}}$  based on the chi-squared distribution; 2) if the global test is not  
 497 significant to an error  $\alpha$  then we do not reject the homogeneity of the  $J$  PVs, but if the  
 498 hypothesis test is significant then the causes of significance are investigated comparing the  
 499 PPVs (NPVs) in pairs (equation (14)) and applying an adjustment method of the  $p$ -value  
 500 based on multiple comparisons (e.g. Bonferroni or Holm).

501

## 502 7. Discussion

503 The comparison of the positive and negative predictive values of two binary diagnostic tests is  
 504 an important topic in the study of Statistical Methods in Diagnostic Medicine. Subject to a  
 505 cross-sectional sampling, this topic has been subject to different studies. In this article we  
 506 studied the simultaneous comparison of the predictive values of two diagnostic tests subject to  
 507 a case-control sampling, analysing and comparing several methods. These methods consisted  
 508 of a global test based on the chi-square distribution, a method based on the individual  
 509 comparisons each one to a nominal error  $\alpha$ , and another three methods based on individual

510 comparisons along with a multiple comparison method. The multiple comparison methods  
511 that were used were Bonferroni's method and Holm's method, which are methods based on  
512 the p-values of the individual hypothesis tests and are very easy to apply.

513 Simulation experiments were carried out to study the type I errors and the power of the  
514 four methods proposed. These experiments were based on the generation samples with type I  
515 bivariate binomial distributions, which are the distributions that are inherent to case-control  
516 design, since from these samples proportions of marginal totals are estimated. The results  
517 have shown that the global hypothesis test based on the chi-square distribution behaves well  
518 in terms of type I error, and does not overwhelm the nominal error  $\alpha = 5\%$ . Regarding its  
519 power, in general this strongly depends on the disease prevalence, and it is necessary to have  
520 very large samples ( $n_i > 500$ ) when the prevalence is small and relatively small sample sizes  
521 ( $n_i \geq 50$ ) when the prevalence is high, so that the power will be high. The simulation  
522 experiments also showed that the methods based on individual hypothesis tests along with  
523 multiple comparison methods have type I errors and very similar power to those of the global  
524 test based on the chi-square distribution. Consequently, both methods can be used to compare  
525 the PVs of the two BDTs. Furthermore, the experiments also showed that the comparison of  
526 the predictive values of two diagnostic tests cannot be made independently i.e. comparing the  
527 two positive predictive values and comparing the two negative predictive values  
528 independently to an error  $\alpha = 5\%$ , as it is possible to obtain a type I error that clearly  
529 overwhelms the nominal error set. Based on the results of the simulation experiments, a  
530 method has been proposed to compare the predictive values of two diagnostic tests subject to  
531 a case-control sampling. This method, which is similar to that proposed by Roldán-Nofuentes  
532 et al (2012), consists of the following steps: 1) Simultaneously comparing the predictive  
533 values applying the global hypothesis test based on the chi-square distribution (equation (13))  
534 to an error  $\alpha$ ; 2) If the global hypothesis test is not significant, then the equality hypothesis of

535 the PVs is not rejected. If the global hypothesis test is significant to an error  $\alpha$ , then the  
536 causes of the significance are studied solving the individual hypothesis tests (equation (14))  
537 and applying Bonferroni's method or Holm's method to an error  $\alpha$ . This procedure that we  
538 propose is similar to the Analysis of Variance: firstly, the global test is solved and, if this is  
539 significant, then the causes of the significance are studied starting with paired comparisons  
540 along with some multiple comparison method.

541 Simulation experiments were carried out to study the effect of a misspecification of the  
542 prevalence in the asymptotic behaviour of the global hypothesis test based on the chi-square  
543 distribution and on the methods based on multiple comparisons. From the results obtained, we  
544 can conclude that light or moderate overestimations or underestimations of the prevalence do  
545 not have an important effect on the behaviour of these hypothesis tests.

546 The proposed model has been applied to a real example on the diagnosis of the Human  
547 African Trypanosomiasis (HAT) in Uganda, disease that is a major public health problem in  
548 some African countries, and whose correct diagnosis is essential for a proper treatment. The  
549 results obtained have shown that, when the prevalence is small, the positive predictive value  
550 of the NASBA-OC test is significantly greater than that of the PCR-OC test, and there are no  
551 significant differences between the negative predictive values of both diagnostic tests.  
552 Therefore, when the prevalence of HAT is small, the NASBA-OC test is a better test than the  
553 PCR-OC test to confirm the presence of the HAT. When the prevalence of HAT is very high,  
554 the equality of the predictive values has not been rejected (although an increase of the two  
555 samples may be convenient), and therefore it is not rejected that both diagnostic tests are  
556 equally valid to confirm and to exclude the presence of the HAT.

557 Finally, the global hypothesis test was extended to the situation in which we  
558 simultaneously compare the PVs of more than two BDTs, and for this we propose a method  
559 which is similar to that proposed for two BDTs. To be able to calculate the global test

560 statistic,  $Q^2 = \hat{\omega}^T \mathbf{A}^T (\mathbf{A} \hat{\Sigma}_{\hat{\omega}} \mathbf{A}^T)^{-1} \mathbf{A} \hat{\omega}$ , it is necessary for the matrix  $\mathbf{A} \hat{\Sigma}_{\hat{\omega}} \mathbf{A}^T$  to be non-  
561 singular. For two BDTs, the matrix  $\mathbf{A} \hat{\Sigma}_{\hat{\omega}} \mathbf{A}^T$  is non-singular when it is verified that  
562  $n_{110} + n_{101} > 0$  and that  $n_{210} + n_{201} > 0$ ; therefore, if  $n_{110} = n_{101} = 0$  and  $n_{210} = n_{201} = 0$  then the  
563 method proposed to compare the PVs cannot be applied.

564

## 565 **Acknowledgements**

566 This research was supported by the Spanish Ministry of Economy, Grant Number MTM2016-  
567 76938-P.

568

## 569 **References**

- 570 Bennett BM. On comparison of sensitivity, specificity and predictive value of a number of  
571 diagnostic procedures. *Biometrics* 1972;28:793-800.
- 572 Bennett BM. On tests for equality of predictive values for t diagnostic procedures. *Statistics in*  
573 *Medicine* 1985;4:535-9.
- 574 Bonferroni CE. *Teoria statistica delle classi e calcolo delle probabilità*. Pubblicazioni del R  
575 Istituto Superiore di Scienze Economiche e Commerciali di Firenze 1936;8:3-62.
- 576 Holm S. A simple sequential rejective multiple testing procedure. *Scandinavian Journal of*  
577 *Statistics* 1979;6:65-70.
- 578 Kocherlakota S, Kocherlakota, K. *Bivariate discrete distributions*. New York: Marcel Dekker  
579 INC; 1992.
- 580 Kosinski AS. A weighted generalized score statistic for comparison of predictive values of  
581 diagnostic tests. *Statistics in Medicine* 2013;32:964-977.
- 582 Leisenring W, Alonzo T, Pepe MS. Comparisons of predictive values of binary medical  
583 diagnostic tests for paired designs. *Biometrics* 2000;56:345-351.

584 Matuvo E, Mugasa CM, Ekangu RA, Deborggrave S, Lubega GW, Laurent T, Schoone GJ,  
585 Schallig HD, Büscher P. Phase II evaluation of sensitivity and specificity of PCR and NASBA  
586 followed by oligochromatography for diagnosis of human African trypanosomiasis in clinical  
587 samples from D.R. Congo and Uganda. *PLOS Neglected Tropical Diseases* 2010;4: e737.

588 Mercado ND, Kit FL, Zhou XH. Confidence intervals for predictive values with an emphasis to  
589 case-control studies. *Statistics in Medicine* 2007;26:2170-2183.

590 Moskowitz CS, Pepe MS. Comparing the predictive values of diagnostic tests: sample size  
591 and analysis for paired study designs. *Clinical Trials* 2006;3:272-9.

592 Pepe MS (2003). *The statistical evaluation of medical tests for classification and prediction*. New  
593 York: Oxford University Press; 2003.

594 Roldán-Nofuentes JA, Luna del Castillo JD, Montero-Alonso MA. Global hypothesis test to  
595 simultaneously compare the predictive values of two binary diagnostic tests. *Computational*  
596 *Statistics and Data Analysis*, Special issue “Computational Statistics for Clinical Research”  
597 2012;56:1161-1173.

598 Torrance-Rynard VL, Walter SD. Effects of dependent errors in the assessment of diagnostic  
599 test performance. *Statistics in Medicine* 1997;16:2157-2175.

600 Vacek PM. The effect of conditional dependence on the evaluation of diagnostic tests.  
601 *Biometrics* 1985;41:959-968.

602 Wang W, Davis CS, Soong SJ. Comparison of predictive values of two diagnostic tests from  
603 the same sample of subjects using weighted least squares. *Statistics in Medicine*  
604 2006;25:2215-2229.

605  
606  
607  
608

609 **Appendix A**

610 Performing algebraic operations in equation (11) it is found that:

611 
$$Var(PPV_1) = \left( \frac{p^2 Se_1 + pQ_1}{Q_1^2} \right)^2 Var(Se_1) + \left( \frac{pqSe_1}{Q_1^2} \right)^2 Var(Sp_1),$$

612 
$$Var(PPV_2) = \left( \frac{p^2 Se_2 + pQ_2}{Q_2^2} \right)^2 Var(Se_2) + \left( \frac{pqSe_2}{Q_2^2} \right)^2 Var(Sp_2),$$

613 
$$Var(NPV_1) = \left( \frac{pqSp_1}{(1-Q_1)^2} \right)^2 Var(Se_1) + \left( \frac{q(1-Q_1) - q^2Sp_1}{(1-Q_1)^2} \right)^2 Var(Sp_1),$$

614 
$$Var(NPV_2) = \left( \frac{pqSp_2}{(1-Q_2)^2} \right)^2 Var(Se_2) + \left( \frac{q(1-Q_2) - q^2Sp_2}{(1-Q_2)^2} \right)^2 Var(Sp_2),$$

615 
$$Cov(PPV_1, PPV_2) = \left( \frac{pQ_1 - p^2Se_1}{Q_1^2} \right) \left( \frac{pQ_2 - p^2Se_2}{Q_2^2} \right) Cov(Se_1, Se_2) + \frac{p^2q^2Se_1Se_2}{Q_1^2Q_2^2} Cov(Sp_1, Sp_2),$$

$$Cov(PPV_1, NPV_1) =$$

616 
$$\frac{pq}{Q_1^2(1-Q_1)^2} \left[ (pQ_1 - p^2Se_1)Sp_1Var(Se_1) + \{q(1-Q_1) - q^2Sp_1\}Se_1Var(Sp_1) \right],$$

$$Cov(PPV_1, NPV_2) =$$

617 
$$\frac{pq(pQ_1 - p^2Se_1)}{Q_1^2(1-Q_2)^2} Sp_2Cov(Se_1, Se_2) + \frac{pq\{q(1-Q_2) - q^2Sp_2\}}{Q_1^2(1-Q_2)^2} Se_1Cov(Sp_1, Sp_2),$$

$$Cov(PPV_2, NPV_1) =$$

618 
$$\frac{pq}{Q_2^2(1-Q_1)^2} \left[ (pQ_2 - p^2Se_2)Sp_1Cov(Se_1, Se_2) + \{q(1-Q_1) - q^2Sp_1\}Se_2Cov(Sp_1, Sp_2) \right],$$

$$Cov(PPV_2, NPV_2) =$$

619 
$$\frac{pq}{Q_2^2(1-Q_2)^2} \left[ (pQ_2 - p^2Se_2)Sp_2Var(Se_2) + \{q(1-Q_2) - q^2Sp_2\}Se_2Var(Sp_2) \right]$$

620 and



$$621 \quad \text{Cov}(NPV_1, NPV_2) = \frac{p^2 q^2 Sp_1 Sp_2}{(1-Q_1)^2 (1-Q_2)^2} \text{Cov}(Se_1, Se_2) + \left( \frac{q(1-Q_1) - q^2 Sp_1}{(1-Q_1)^2} \right) \left( \frac{q(1-Q_2) - q^2 Sp_2}{(1-Q_2)^2} \right) \text{Cov}(Sp_1, Sp_2),$$

622 where  $q = 1 - p$  and  $Q_i = P(T_i = 1) = p \times Se_i + q \times (1 - Sp_i)$ .

623

## 624 **Appendix B**

625 Let us assume that we are going to solve K hypothesis test  $H_{0k}$  vs  $H_{1k}$  with  $k = 1, \dots, K$ . Let

626  $p_{[1]} \leq p_{[2]} \leq \dots \leq p_{[K]}$  be the *p-values* obtained ordered from the lowest to the highest, and

627 therefore  $p_{[k]}$  is the *p-value* that corresponds to the hypothesis test  $H_{0[k]}$  vs  $H_{1[k]}$ . Holm's

628 method [12] consists of the following steps:

629 Step 1. If  $p_{[1]} \leq \alpha/K$  hypothesis  $H_{0[1]}$  is rejected and we go to the next step; if  $p_{[1]} > \alpha/K$

630 no null hypothesis is rejected and the process finishes.

631 Step 2. If  $p_{[2]} \leq \alpha/(K-1)$  hypothesis  $H_{0[2]}$  is rejected and we go to the next step; if

632  $p_{[2]} > \alpha/(K-1)$  we do not reject the null hypotheses  $H_{0[k]}$  with  $k = 2, \dots, K$  and the process

633 finishes....

634 Step K. If  $p_{[K]} \leq \alpha$  hypothesis  $H_{0[K]}$  is rejected and the process finishes; and if  $p_{[K]} > \alpha$

635  $H_{0[K]}$  is not rejected and the process finishes.
